# Supplementary material
Source: publisher figshare collection journal article supplement (https://diabetesjournals.figshare.com/ndownloader/files/34497932)
Supplement: Supplementary file 1 [file 34497932]

## Supplementary Figures

### **Leptin signaling suppression in macrophages improves immunometabolic outcomes in obesity**

Lauar de Brito Monteiro<sup>1</sup>, Juliana Silveira Prodonoff<sup>1</sup>, Cristhiane Favero de Aguiar<sup>1</sup>, Felipe Correa-da-Silva<sup>1</sup>, Angela Castoldi<sup>2</sup>, Nikki van Teijlingen Bakker<sup>3</sup>, Gustavo Gastão Davanzo<sup>1</sup>, Bianca Castelucci<sup>1</sup>, Jéssica Aparecida da Silva Pereira<sup>1,8</sup>, Jonathan Curtis<sup>3, 4</sup>, Jörg Büscher<sup>3</sup>, Larissa Menezes dos Reis<sup>1</sup>, Gisele Castro<sup>1</sup>, Guilherme Ribeiro<sup>1</sup>, João Victor Virgílio-da-Silva<sup>1</sup>, Douglas Adamoski<sup>5</sup>, Sandra Martha Gomes Dias<sup>5</sup>, Silvio Roberto Consonni<sup>6</sup>, Jose Donato Jr<sup>7</sup>, Edward J. Pearce<sup>3,4</sup>, Niels Olsen Saraiva Câmara<sup>8</sup>, Pedro M. Moraes-Vieira<sup>1, 9, 10 \*</sup>

<sup>1</sup>Laboratory of Immunometabolism, Department of Genetics, Evolution, Microbiology and Immunology, University of Campinas, Brazil.

<sup>2</sup>Laboratory Keizo Asami, Immunopathology Laboratory, Federal University of Pernambuco, Pernambuco, Brazil.

<sup>3</sup>Department of Immunometabolism, Max Planck Institute of Epigenetics and Immunobiology, Freiburg im Breisgau, Germany.

<sup>4</sup>Bloomberg Kimmel Institute, and Department of Oncology, Johns Hopkins University School of Medicine, Baltimore, USA.

<sup>5</sup>Brazilian Biosciences National Laboratory (LNBio), Brazilian Center for Research in Energy and Materials (CNPEM), Campinas, Sao Paulo, Brazil.

<sup>6</sup>Department of Biochemistry & Tissue Biology, Institute of Biology, University of Campinas, Campinas, Brazil.

<sup>7</sup>Department of Physiology and Biophysics, Institute of Biomedical Sciences, University of São Paulo, São Paulo, Brazil.

<sup>8</sup>Department of Immunology, Institute of Biomedical Sciences IV, University of São Paulo, São Paulo, Brazil.

<sup>9</sup>Experimental Medicine Research Cluster (EMRC), University of Campinas, São Paulo, Brazil.

<sup>10</sup>Obesity and Comorbidities Research Center (OCRC), University of Campinas, São Paulo, Brazil.

\* Corresponding author: Prof. Dr. Pedro M M Moraes-Vieira, Department of Genetics, Evolution, Microbiology and Immunology, Institute of Biology, University of Campinas, São Paulo, Brazil. E-mail: [pmvieira@unicamp.br](mailto:pmvieira@unicamp.br)

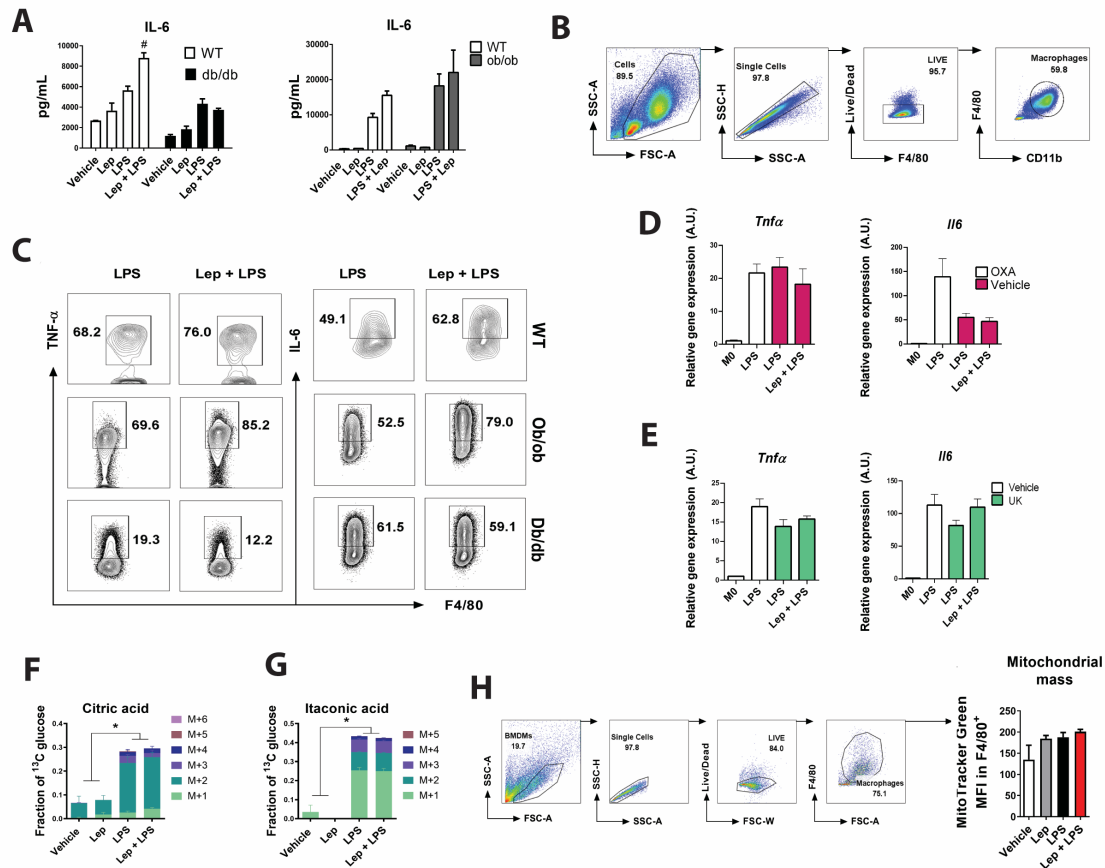

**Supplementary Figure 1.** Leptin directly modulates macrophage metabolism.

A) Concentration of IL-6 in the supernatant of leptin/LPS activated BMDMs from wild type (WT), db/db, or ob/ob mice by ELISA;

B) Flow cytometry gating Strategy for analysis of live peritoneal macrophages;

C) TNF-α and IL-6 positive macrophages from peritoneal lavage of WT, ob/ob and db/db mice were analyzed by flow cytometry;

D) Relative gene expression of *Tnfa* and *Il6* from BMDMs treated with 40 mM oxamate (OXA), and/or leptin+LPS for 6 hours.

E) Relative gene expression of *Tnfa* and *Il6* from BMDMs treated with 10 μM UK-5099 (UK), and/or leptin+LPS for 6 hours.

F-G) Fraction contribution of glucose carbons into citrate and G) itaconate, in macrophages stimulated with leptin/LPS for 6 hours and cultured in <sup>13</sup>C-glucose containing medium;

H) Flow cytometry gating strategy and Median of Fluorescence Intensity (MFI) of MitoTracker Green positive BMDMs after 6 hours of activation with leptin/LPS;

Data are represented as mean values ± s.e.m. n=3/5 per group. One-way ANOVA with Bonferroni's multiple comparison test (A, D-H) \*p<0.05; #p<0.05 compared to all groups; Data are representative of three/two independent experiments.

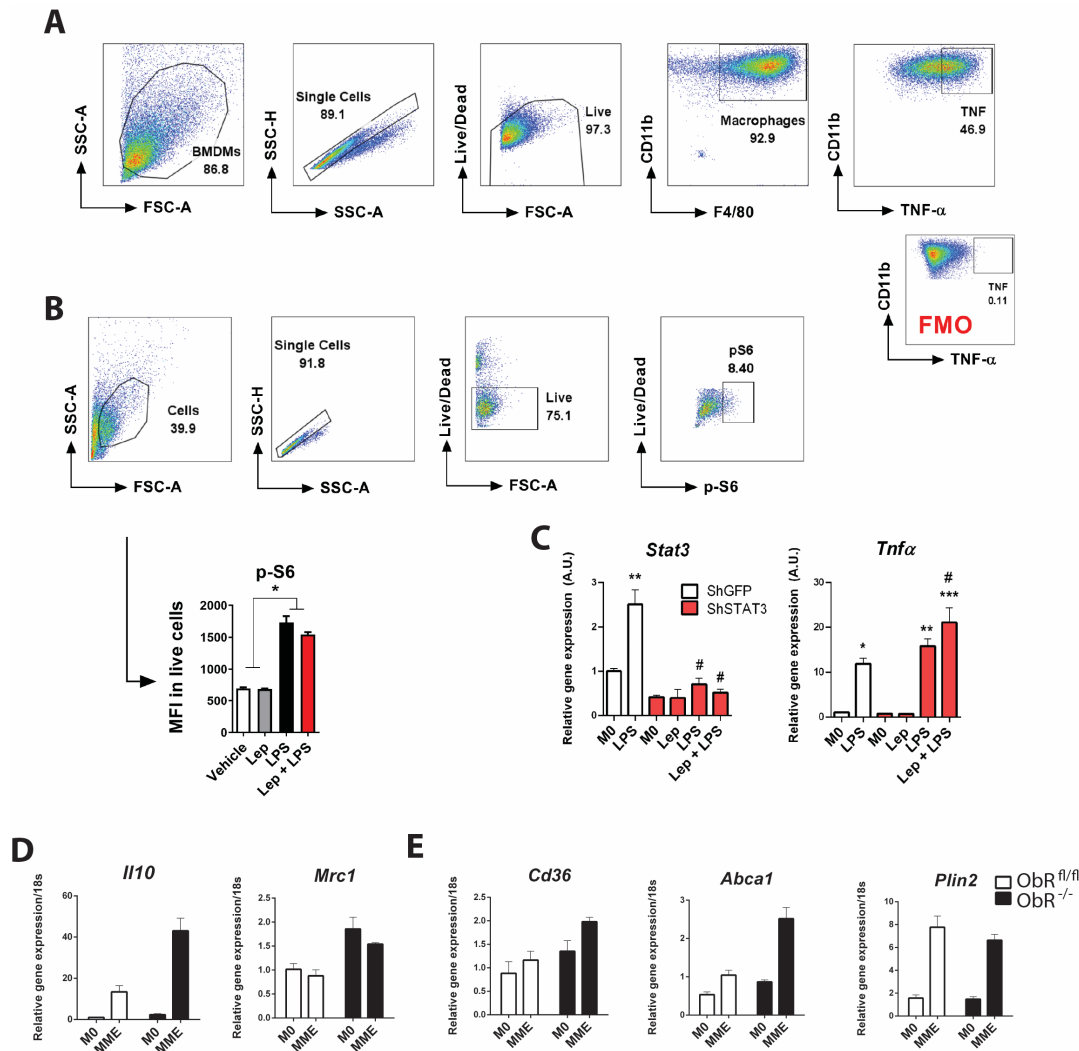

**Supplementary Figure 2.** Strategies for studying leptin signaling in macrophages.

A) Representative flow cytometry gating strategy of cytokines (in this case, TNF- $\alpha$ ) positive BMDMs after 6 hours of activation with leptin/LPS (100 ng/mL);

B) Representative flow cytometry gating strategy and MFI of phospho-S6 positive BMDMs after 30 min activation with leptin/LPS;

C) Relative gene expression of *Stat3* and *Tnfα* by shSTAT3 or shGFP (control) transduced BMDMs;

D) Relative gene expression of *Il10* and *Mrc1* by metabolically activated macrophages (MME);

E) Relative gene expression of *Cd36*, *Abca1* and *Plin2* in metabolically activated macrophages (MME);

Data are represented as mean values  $\pm$  s.e.m. (C, F).  $n=3/5$  per group. One-way ANOVA with Bonferroni's multiple comparison test (C, E). A, B representative of three independent experiments, C-F representative of two independent experiments. MFI: Median of Fluorescence Intensity.

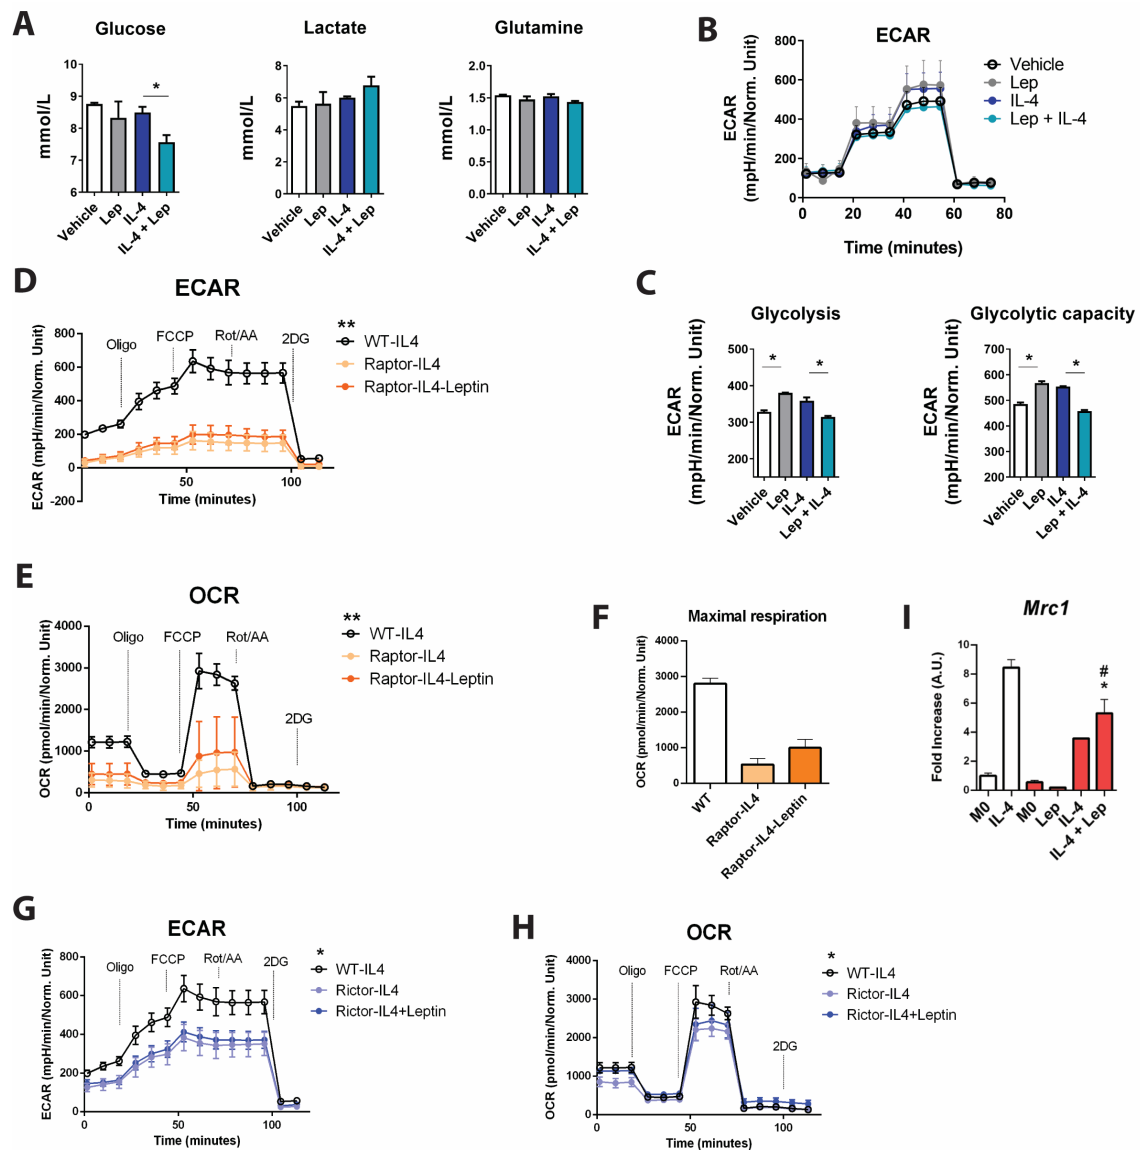

**Supplementary Figure 3.** Metabolic effects of leptin on M(IL-4).

A) Concentration of Glucose, Lactate and Glutamine concentrations in the supernatant of BMDMs were measured by Bioanalyser;

B) Extracellular acidification rate (ECAR) of macrophages upon glycolytic stress (injections of glucose, oligomycin and 2-DG);

C) ECAR analysis of glycolysis (followed by glucose injection); Glycolytic capacity (followed by oligomycin injection).

D) Extracellular acidification rate (ECAR) of IL-4-treated macrophages from WT and Raptor<sup>-/-</sup> mice upon glycolytic stress (injections of glucose, oligomycin and 2-DG);

E) Oxygen consumption rate (OCR) of IL-4-treated macrophages from WT and Raptor<sup>-/-</sup> mice upon mitochondrial stress test (injections of oligomycin, FCCP, antimycin and rotenone);

F) Maximal respiration (followed by FCCP injection) of IL-4-treated macrophages from WT and Raptor<sup>-/-</sup> mice;

G) Extracellular acidification rate (ECAR) of IL-4-treated macrophages from WT and Rictor<sup>-/-</sup> mice upon glycolytic stress (injections of glucose, oligomycin and 2-DG);

H) Oxygen consumption rate (OCR) of IL-4-treated macrophages from WT and Rictor<sup>-/-</sup> mice upon mitochondrial stress test (injections of oligomycin, FCCP, antimycin and rotenone);

I) Relative gene expression of Mrc1 by shSTAT3 or shGFP (control) transduced BMDMs.

Data are represented as mean values  $\pm$  s.e.m. n=3/5 per group. One-way ANOVA with Bonferroni's multiple comparison test. A-H representative of two to three independent experiments.

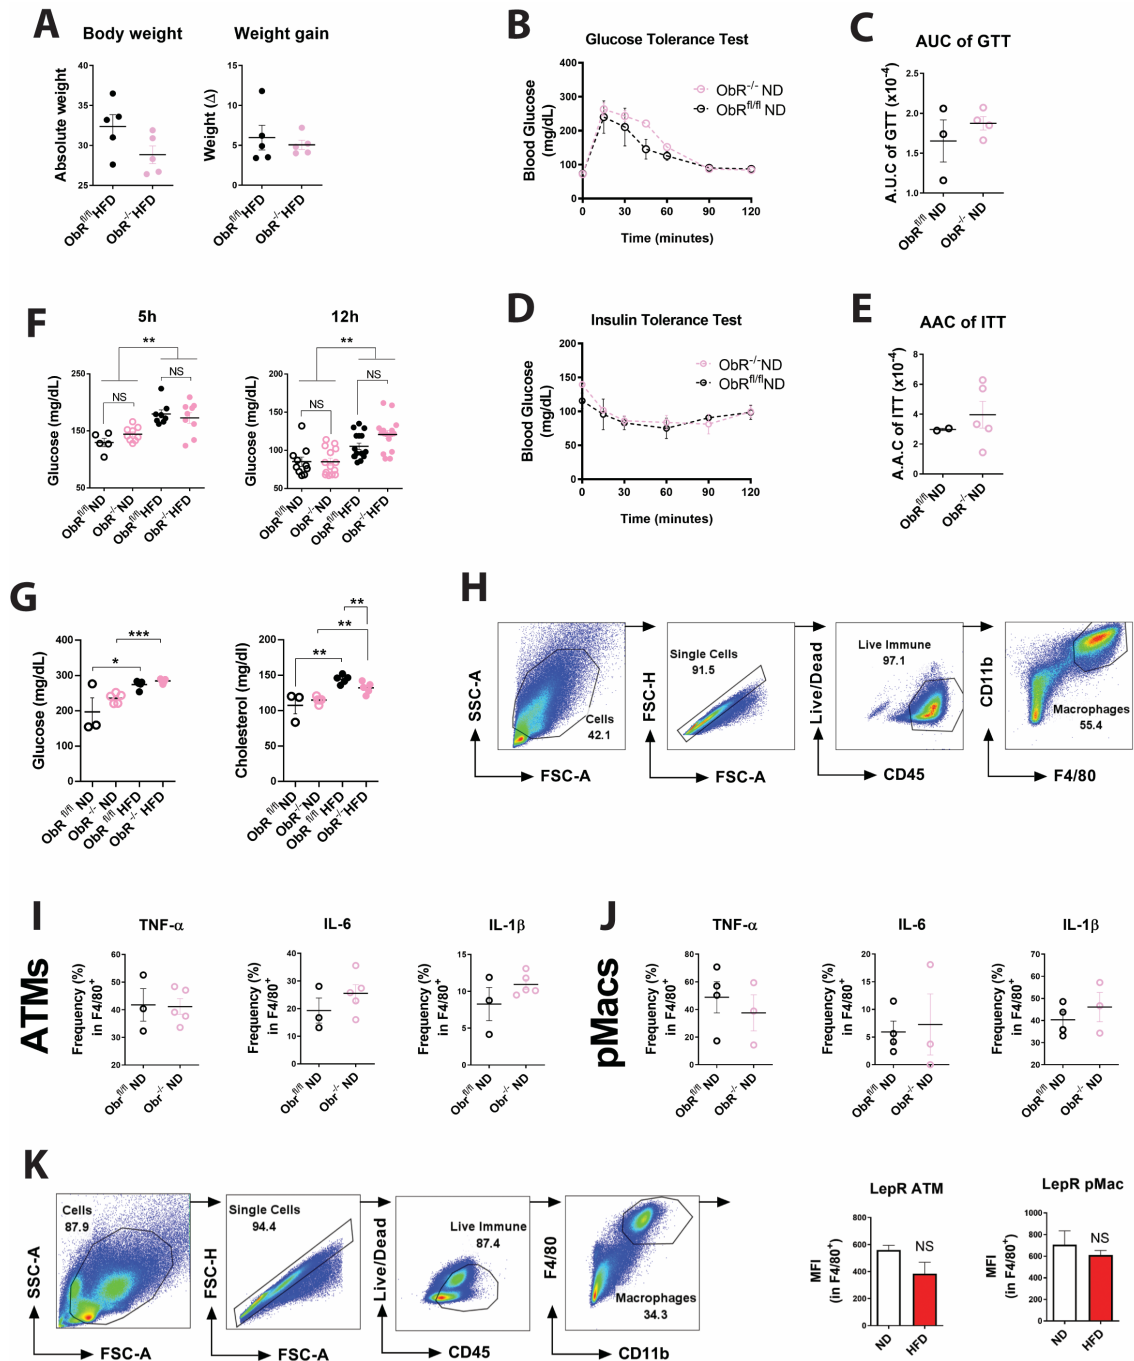

**Supplementary Figure 4.** Metabolic and immune evaluation of ObR<sup>fl/fl</sup> and ObR<sup>-/-</sup> mice fed with chow and high fat diet.

A) Absolute body weight (g) and weight gain (Δ) of ObR<sup>fl/fl</sup> mice and ObR<sup>-/-</sup> mice fed a high fat diet (HFD) over the course of 16 weeks;

B) Insulin Tolerance Test (ITT) in chow-fed ObR<sup>fl/fl</sup> and ObR<sup>-/-</sup> mice;

C) Area under the curve (AUC) of ITT test in chow-fed ObR<sup>fl/fl</sup> and ObR<sup>-/-</sup> mice;

D) Insulin Tolerance Test (ITT) in chow-fed ObR<sup>fl/fl</sup> and ObR<sup>-/-</sup> mice;

E) Area above the curve (AAC) of ITT test in chow-fed ObR<sup>fl/fl</sup> and ObR<sup>-/-</sup> mice

F) Glucose levels in the blood after 5 and 12 hours of fasting;

G) Glucose and cholesterol levels in the serum of ND- and HFD-fed ObR<sup>fl/fl</sup> and ObR<sup>-/-</sup> mice;

H) Flow cytometry gating strategy for evaluation of live macrophages;

I) Frequency of IL-6, IL-1 $\beta$  and TNF- $\alpha$  positive macrophages (F4/80<sup>+</sup>) from the AT of chow-fed ObR<sup>fl/fl</sup> and ObR<sup>-/-</sup> mice;

J) Frequency of IL-6, IL-1 $\beta$  and TNF- $\alpha$  positive macrophages (F4/80<sup>+</sup>) from the peritoneal lavage of chow-fed ObR<sup>fl/fl</sup> and ObR<sup>-/-</sup> mice;

K) Flow cytometry gating strategy for macrophage isolation and MFI analysis of ObR expression in ATMs and pMacs of chow- (normal diet - ND) and HFD-fed ObR reporter mice.

Data are represented as mean values  $\pm$  s.e.m. n=3/5 per group. Two-way ANOVA Sidak's multiple comparison test Unpaired (b, d). Two-tailed Student's t test (A, C, E, I-K). One-way ANOVA with Bonferroni's multiple comparison test (F-G). A-K representative of two to three experiments. MFI: Median of Fluorescence Intensity.

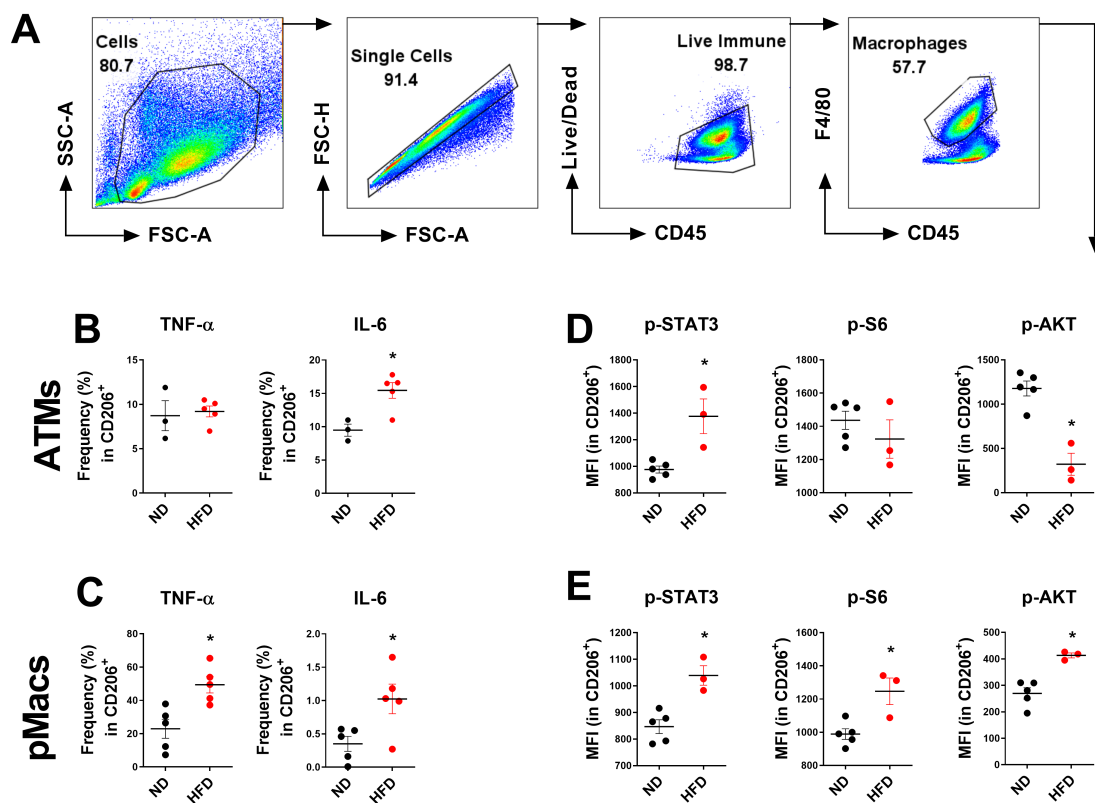

**Supplementary Figure 5.** High fat diet impact on AT and peritoneal CD206<sup>+</sup> macrophages.

A) Flow cytometry representative gating strategy to select macrophages from the AT and peritoneal lavage;

B) Frequency of TNF- $\alpha$  and IL-6 positive CD206<sup>+</sup> macrophages from the AT of mice fed a chow normal diet (ND) or a high fat diet (HFD);

C) Frequency of TNF- $\alpha$  and IL-6 positive CD206<sup>+</sup> macrophages from the peritoneal lavage of mice fed a chow normal diet (ND) or a high fat diet (HFD);

D) MFI of phospho-STAT3, phospho-S6 and phospho- AKT<sup>ser473</sup> in CD206<sup>+</sup> macrophages from the AT of mice fed a chow normal diet (ND) or a high fat diet (HFD);

E) MFI of phospho-STAT3, phospho-S6 and phospho- AKT<sup>ser473</sup> in CD206<sup>+</sup> macrophages from the peritoneal lavage of mice fed a chow normal diet (ND) or a high fat diet (HFD).

Data are represented as mean values  $\pm$  s.e.m. n=3/5 per group. Unpaired two-tailed Student's t test (B-E), \*p<0.05. Data are representative of three experiments. MFI: Median of Fluorescence Intensity.
